# Supplementary material for: Reticulated three-dimensional network ablative composites for heat shields in thermal protection systems
Source: Royal Society of Chemistry journal article supplement (doi:10.1039/c4ra05811a), 2014-08-29
Supplement: c4ra05811a1.pdf [file c4ra05811a1.pdf]

The authors have synthesized Phenol Formaldehyde in our laboratory and performed oxy acetylene flame test under same parameters. The differences found between PF and RF are tabulated below (Table 1). Also, pictures have been taken of the blistered PF surface (Fig 1) and after ablation (Fig 2).

| <b>Parameter/<br/>Property</b>        | <b>Phenol Formaldehyde (Molar ratio<br/>of P/F= 1/2)</b>                            | <b>Resorcinol Formaldehyde (Molar<br/>ratio of R/F= 1/2)</b>                         |
|---------------------------------------|-------------------------------------------------------------------------------------|--------------------------------------------------------------------------------------|
| Concentration of Catalyst             | 10 ml 40% NaOH                                                                      | 1 ml 40% NaOH                                                                        |
| Time of polymerization                | 4 hours                                                                             | 20 minutes                                                                           |
| Curing temperature                    | 120°C                                                                               | 60°C                                                                                 |
| Curing Time                           | 12 hours                                                                            | 4 hours                                                                              |
| Surface                               | Blistered surface                                                                   | Defect free                                                                          |
| MAR                                   | 0.085                                                                               | 0.079                                                                                |
| Top view (before Ablation)<br>(Fig 1) |   |  |
| After Ablation<br>(Fig 2)             |  |  |
